# Supplementary material
Source: publisher figshare collection journal article supplement (https://acs.figshare.com/ndownloader/files/11399486)
Supplement: Supplementary file 1 [file 11399486]

## Supporting information for

### Recyclable Thermoresponsive Polymer- $\beta$ -Glucosidase Conjugate with Intact Hydrolysis Activity

Ishita Mukherjee,<sup>a,#</sup> Sushant K. Sinha,<sup>b,#</sup> Supratim Datta<sup>b,c,\*</sup> and Priyadarsi De<sup>a,c,\*</sup>

<sup>a</sup>*Polymer Research Centre, Department of Chemical Sciences,* <sup>b</sup>*Protein Engineering Laboratory, Department of Biological Sciences,* <sup>c</sup>*Centre for Advanced Functional Materials, Indian Institute of Science Education and Research Kolkata, Mohanpur - 741246, Nadia, West Bengal, India*

\*Corresponding Authors. E-mails: p\_de@iiserkol.ac.in (PD), supratim@iiserkol.ac.in (SD)

<sup>#</sup>These authors contributed equally to this work.

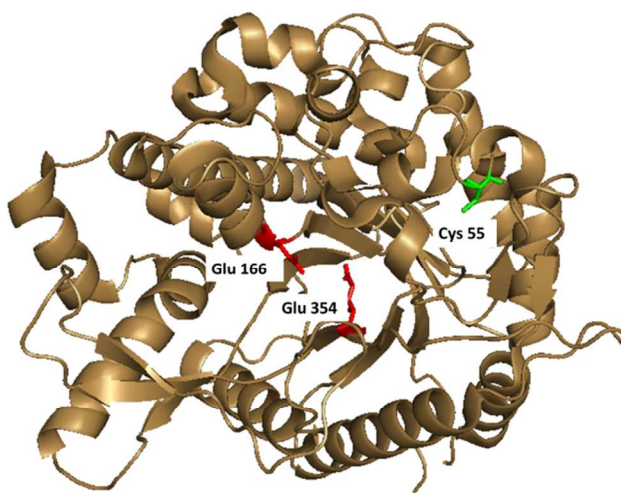

**Figure S1.** Schematic representation of B8CYA8 showing polymer attachment site (Cys 55). The catalytic residues (Glu 166 and Glu 354) are shown in red.

**Table S1. Results from the Synthesis of B8CYA8-PNIPAM Conjugate Using B8CYA8-macroCTA with Two Different [VA-044] : [B8CYA8-macroCTA] Ratios**

| Compound                                                                                          | Conv. <sup>a</sup><br>(%) | $M_{n,theo}$ <sup>b</sup><br>(g/mol) | $M_{n,APC}$ <sup>c</sup><br>(g/mol) | $\bar{D}$ <sup>c</sup> |
|---------------------------------------------------------------------------------------------------|---------------------------|--------------------------------------|-------------------------------------|------------------------|
| B8CYA8                                                                                            | -                         | -                                    | 50000                               | 1.13                   |
| B8CYA8-PNIPAM conjugate prepared at<br>[NIPAM]/[B8CYA8-macroCTA]/[VA-044] = 1000:1:1 <sup>d</sup> | 43                        | 99500                                | 110000                              | 1.21                   |
| B8CYA8-PNIPAM conjugate prepared at<br>[NIPAM]/[B8CYA8-macroCTA]/[VA-044] = 1000:1:2 <sup>e</sup> | 84                        | 145000                               | 115000                              | 1.24                   |

<sup>a</sup> Conversions were calculated by <sup>1</sup>H NMR study. <sup>b</sup>  $M_{n,theo} = ([NIPAM]/[B8CYA8-macroCTA] \times \text{molecular weight (MW) of NIPAM} \times \text{conversion}) + (\text{MW of B8CYA8-macroCTA})$ . <sup>c</sup> Measured by APC. <sup>d</sup> Polymerization time = 24 h. <sup>e</sup> Polymerization time = 4 h.

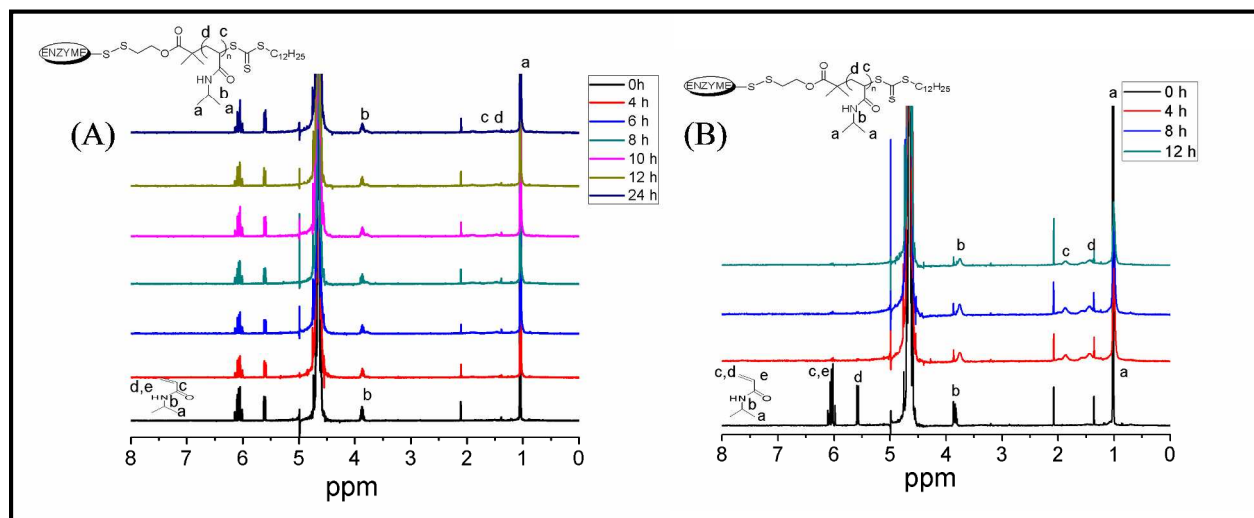

**Figure S2.** <sup>1</sup>H NMR spectra obtained after the polymerization of NIPAM in the presence of B8CYA8-macroCTA as a function of time at [NIPAM]/[B8CYA8-macroCTA]/[VA-044] = 1000/1/1 (A) and 1000/1/2 (B).

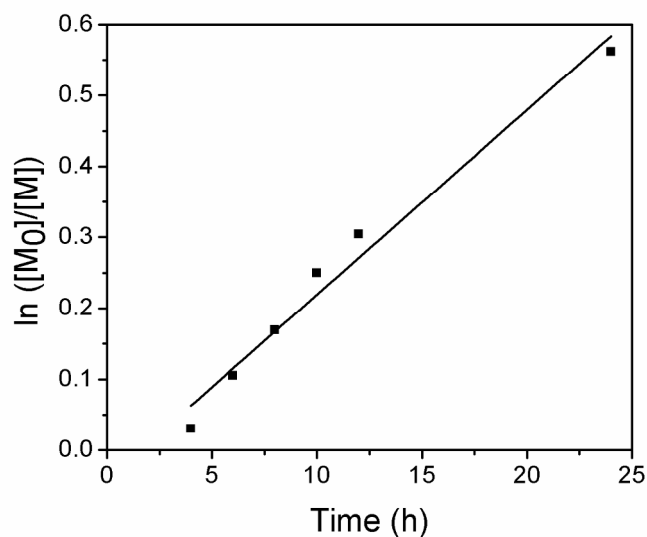

**Figure S3.** Pseudo-first-order kinetics plot for the RAFT polymerization of NIPAM at  $[\text{NIPAM}]/[\text{B8CYA8-macroCTA}]/[\text{VA-044}] = 1000/1/1$ .

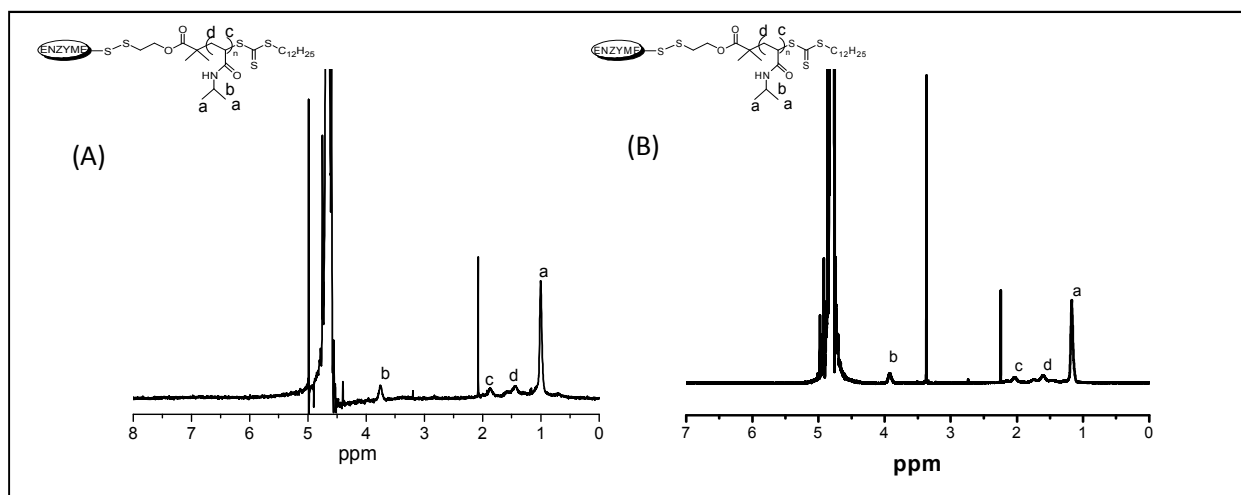

**Figure S4.**  $^1\text{H}$  NMR spectra obtained after the polymerization of NIPAM in the presence of B8CYA8-macroCTA after purification through dialysis at  $[\text{NIPAM}]/[\text{B8CYA8-macroCTA}]/[\text{VA-044}] = 1000/1/1$  (A) and  $1000/1/2$  (B).

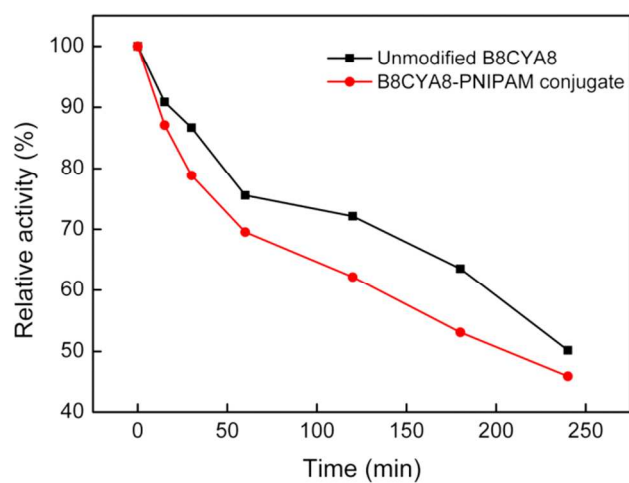

**Figure S5.** Thermostability of the native B8CYA8 and B8CYA8-PNIPAM conjugate. The enzyme was incubated at 70 °C for different time intervals, cooled down and assayed for the residual activity at 30 °C. The activity without any incubation at 70 °C was taken as 100 %.

**Table S2. Concentration and Specific Activity of the Conjugate after Each Cycle of Thermal Precipitation.**

| Cycle | Conjugate (mg) | Specific activity (%)<br>( $\mu\text{mol}/\text{min}/\text{mg}$ ) |
|-------|----------------|-------------------------------------------------------------------|
| 1     | 0.0427         | 100.0 $\pm$ 2.4                                                   |
| 2     | 0.0306         | 95.6 $\pm$ 3.4                                                    |
| 3     | 0.0159         | 100.6 $\pm$ 4.9                                                   |
| 4     | 0.0109         | 99.8 $\pm$ 3.4                                                    |
